# Supplementary material for: Trend Analysis of Global, Regional, and National Burdens of Visual Impairment Due to Refraction Disorders from 1990 to 2021: Findings from the Global Burden of Disease Study 2021
Source: Research Square preprint supplement (doi:10.21203/rs.3.rs-6172901/v1), 2025-04-26
Supplement: Supplementary file 1 [file 7871babfbcd453c95a4c6bd6.docx]

**Table S1 Global prevalence of refraction disorders in all age groups based on the BAPC model predictions**

| **Year** | **Number (×10000)** | | |  | **ASR, per 100,000** | | |
| --- | --- | --- | --- | --- | --- | --- | --- |
| **Both** | **Male** | **Female** |  | **Both** | **Male** | **Female** |
| **1990** | 9598 | 4515 | 5083 |  | 2058 | 1993 | 2127 |
| **1991** | 9742 | 4584 | 5158 |  | 2049 | 1983 | 2118 |
| **1992** | 9890 | 4654 | 5236 |  | 2040 | 1974 | 2111 |
| **1993** | 10038 | 4723 | 5315 |  | 2033 | 1965 | 2105 |
| **1994** | 10189 | 4792 | 5397 |  | 2027 | 1958 | 2100 |
| **1995** | 10342 | 4861 | 5480 |  | 2022 | 1951 | 2096 |
| **1996** | 10513 | 4938 | 5575 |  | 2019 | 1946 | 2095 |
| **1997** | 10703 | 5023 | 5680 |  | 2019 | 1944 | 2098 |
| **1998** | 10905 | 5113 | 5792 |  | 2021 | 1943 | 2102 |
| **1999** | 11115 | 5207 | 5907 |  | 2023 | 1943 | 2106 |
| **2000** | 11322 | 5302 | 6021 |  | 2025 | 1943 | 2109 |
| **2001** | 11519 | 5391 | 6128 |  | 2024 | 1941 | 2109 |
| **2002** | 11693 | 5471 | 6223 |  | 2017 | 1935 | 2103 |
| **2003** | 11856 | 5544 | 6311 |  | 2009 | 1926 | 2094 |
| **2004** | 12022 | 5620 | 6403 |  | 2000 | 1917 | 2085 |
| **2005** | 12204 | 5702 | 6502 |  | 1993 | 1909 | 2079 |
| **2006** | 12408 | 5794 | 6614 |  | 1988 | 1904 | 2075 |
| **2007** | 12614 | 5888 | 6726 |  | 1982 | 1897 | 2069 |
| **2008** | 12821 | 5982 | 6839 |  | 1975 | 1889 | 2063 |
| **2009** | 13034 | 6078 | 6955 |  | 1968 | 1882 | 2057 |
| **2010** | 13244 | 6173 | 7071 |  | 1962 | 1875 | 2050 |
| **2011** | 13433 | 6259 | 7174 |  | 1952 | 1865 | 2040 |
| **2012** | 13591 | 6331 | 7260 |  | 1937 | 1850 | 2025 |
| **2013** | 13741 | 6401 | 7340 |  | 1920 | 1834 | 2007 |
| **2014** | 13915 | 6481 | 7433 |  | 1907 | 1821 | 1994 |
| **2015** | 14143 | 6586 | 7557 |  | 1902 | 1815 | 1989 |
| **2016** | 14460 | 6730 | 7730 |  | 1907 | 1819 | 1996 |
| **2017** | 14839 | 6902 | 7937 |  | 1920 | 1830 | 2010 |
| **2018** | 15232 | 7080 | 8152 |  | 1934 | 1841 | 2025 |
| **2019** | 15591 | 7242 | 8349 |  | 1942 | 1848 | 2035 |
| **2020** | 15872 | 7381 | 8490 |  | 1942 | 1851 | 2033 |
| **2021** | 15977 | 7422 | 8554 |  | 1924 | 1833 | 2015 |
| **2022** | 16340 | 7565 | 8774 |  | 1920 | 1822 | 2015 |
| **2023** | 16600 | 7681 | 8919 |  | 1917 | 1818 | 2013 |
| **2024** | 16862 | 7798 | 9064 |  | 1915 | 1815 | 2011 |
| **2025** | 17124 | 7915 | 9210 |  | 1912 | 1812 | 2009 |
| **2026** | 17385 | 8030 | 9355 |  | 1909 | 1809 | 2007 |
| **2027** | 17646 | 8145 | 9501 |  | 1907 | 1806 | 2006 |
| **2028** | 17908 | 8259 | 9648 |  | 1905 | 1803 | 2004 |
| **2029** | 18169 | 8374 | 9795 |  | 1903 | 1800 | 2003 |
| **2030** | 18427 | 8488 | 9940 |  | 1900 | 1797 | 2001 |
| **2031** | 18684 | 8600 | 10084 |  | 1898 | 1794 | 1999 |
| **2032** | 18938 | 8710 | 10228 |  | 1896 | 1791 | 1998 |
| **2033** | 19191 | 8819 | 10371 |  | 1894 | 1789 | 1998 |
| **2034** | 19441 | 8928 | 10513 |  | 1892 | 1786 | 1996 |
| **2035** | 19687 | 9035 | 10652 |  | 1890 | 1783 | 1995 |
